# Supplementary material for: Synthesis and fluorescence properties of butadiyne-linked linear and cyclic carbazole oligomers
Source: Royal Society of Chemistry journal article supplement (doi:10.1039/d0ra00830c), 2020-01-01
Supplement: d0ra00830c1.pdf [file d0ra00830c1.pdf]

## **Supporting Informaion**

### **Synthesis and fluorescence properties of butadiyne-linked linear and cyclic carbazole oligomers**

**Kazuya Ogawa,\* Shohei Tanaka and Kyosuke Shimura**

Graduate Faculty of Interdisciplinary Research, University of Yamanashi, 4-3-11 Takeda, Kofu, Yamanashi  
400-8511, Japan

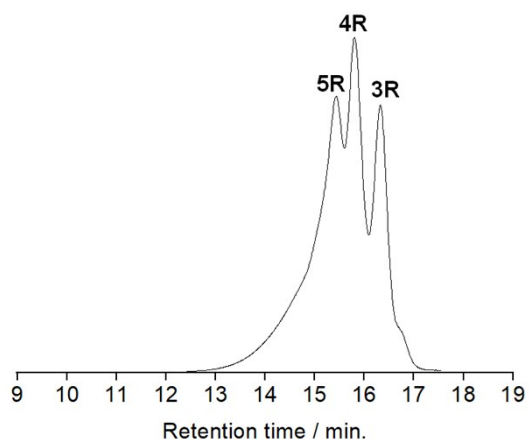

Fig. S1 GPC chart after the reaction of the synthesis of **3R**, **4R**, and **5R**.

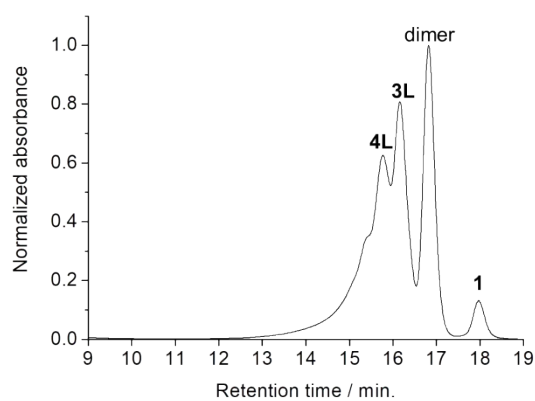

Fig. S2 GPC chart after the reaction of the synthesis of **3L** and **4L**.

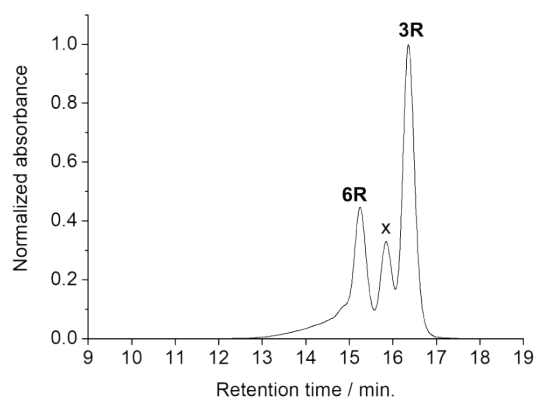

Fig. S3 GPC chart after the reaction of the synthesis of **6R**.

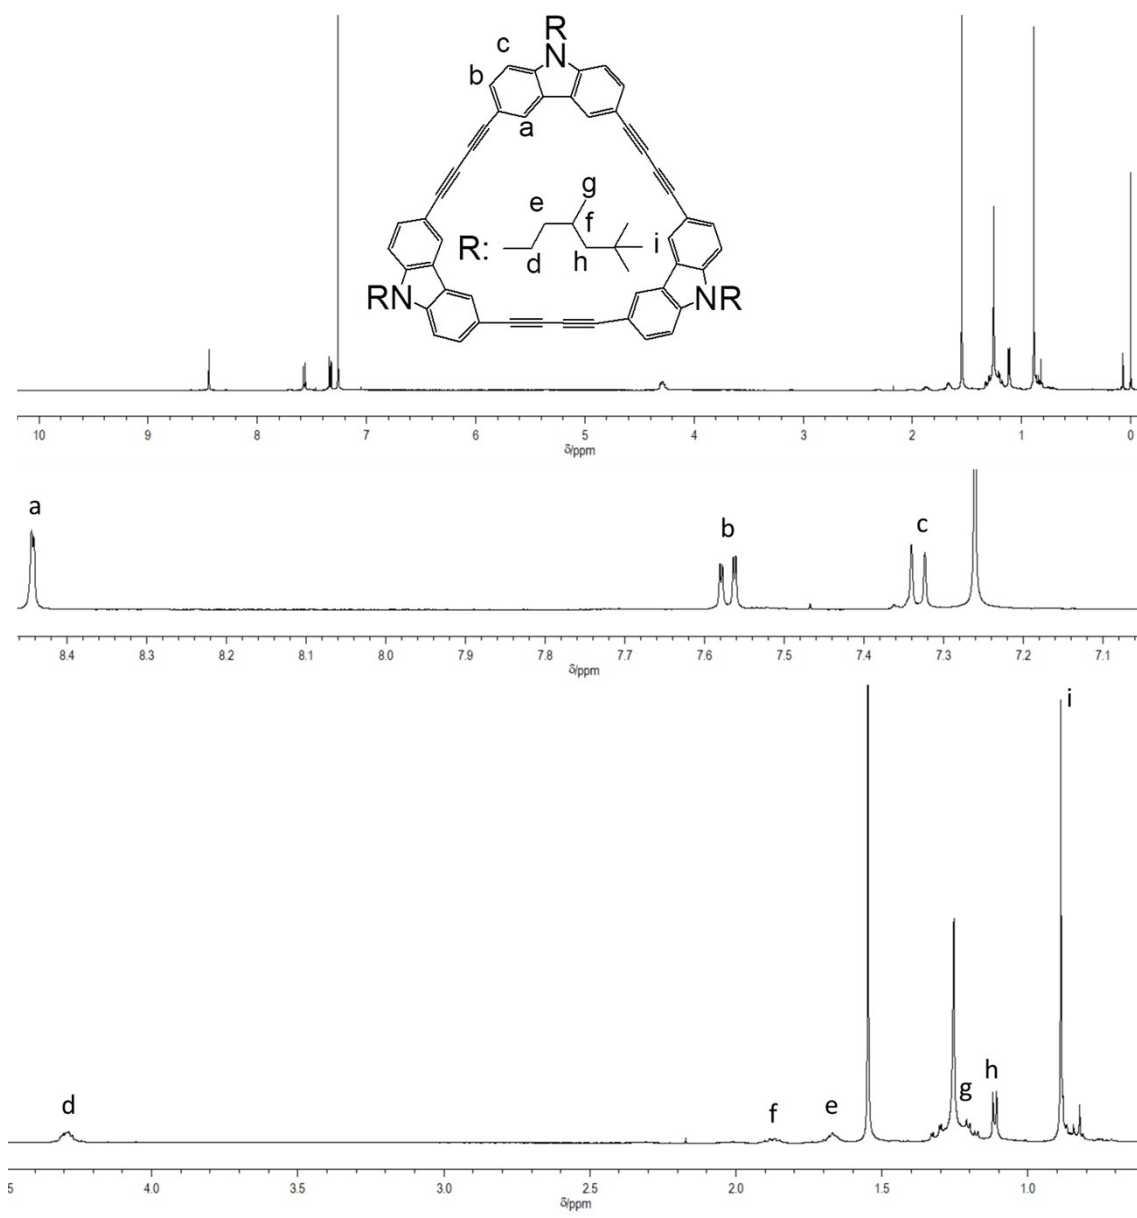

Fig. S4  $^1\text{H}$  NMR spectra of **3R** in  $\text{CDCl}_3$ .

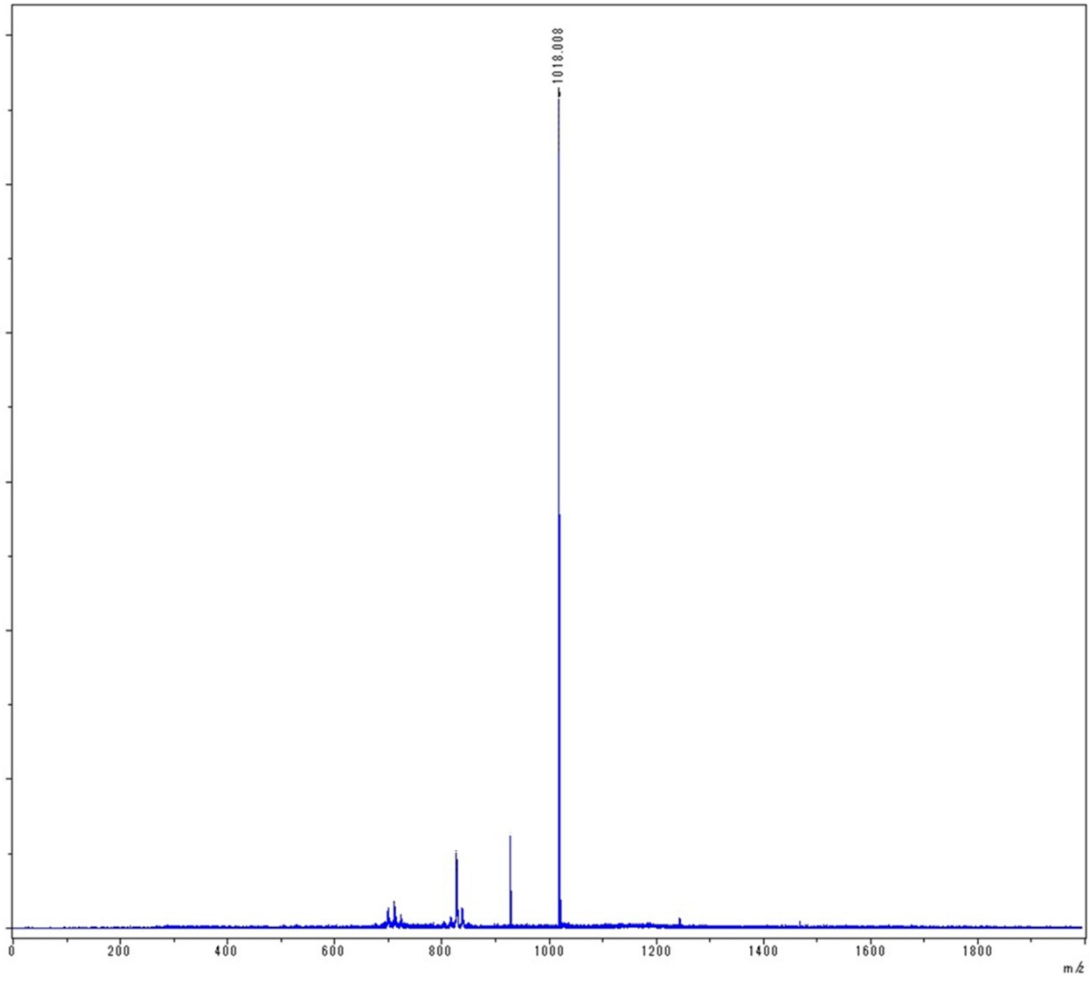

Fig. S5 MALDI-TOF mass chart of **3R**.

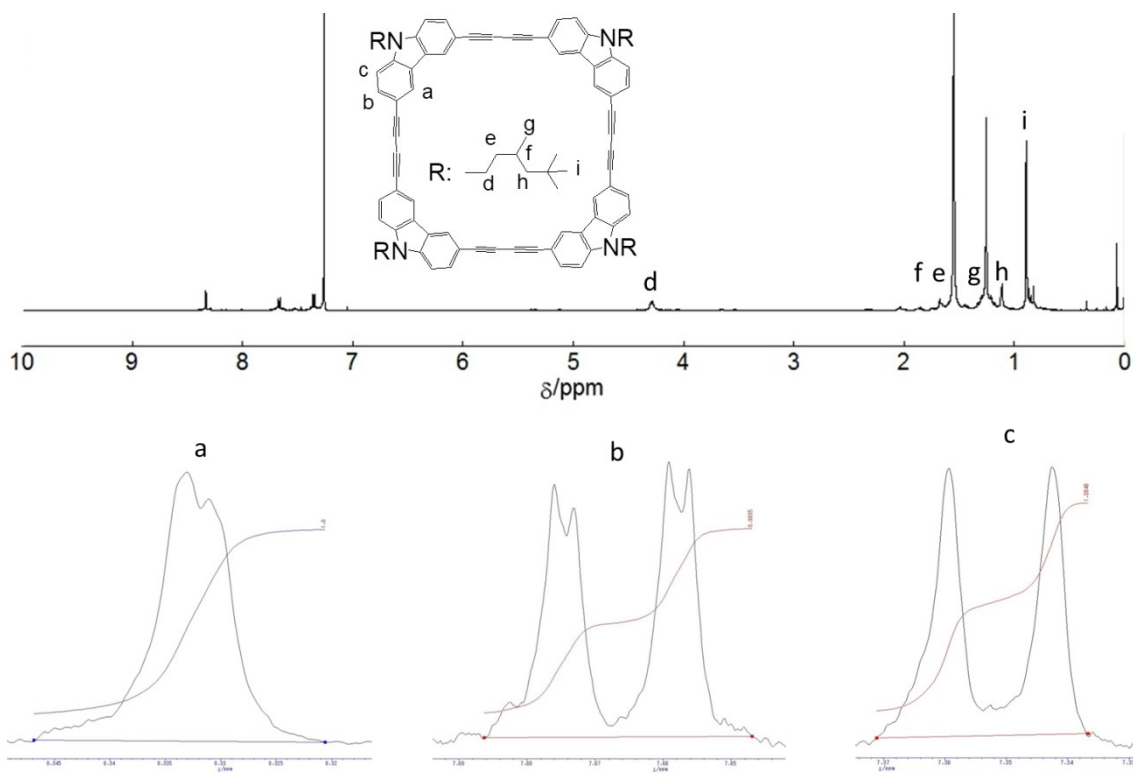

Fig. S6  $^1\text{H}$  NMR spectra of **4R** in  $\text{CDCl}_3$ .

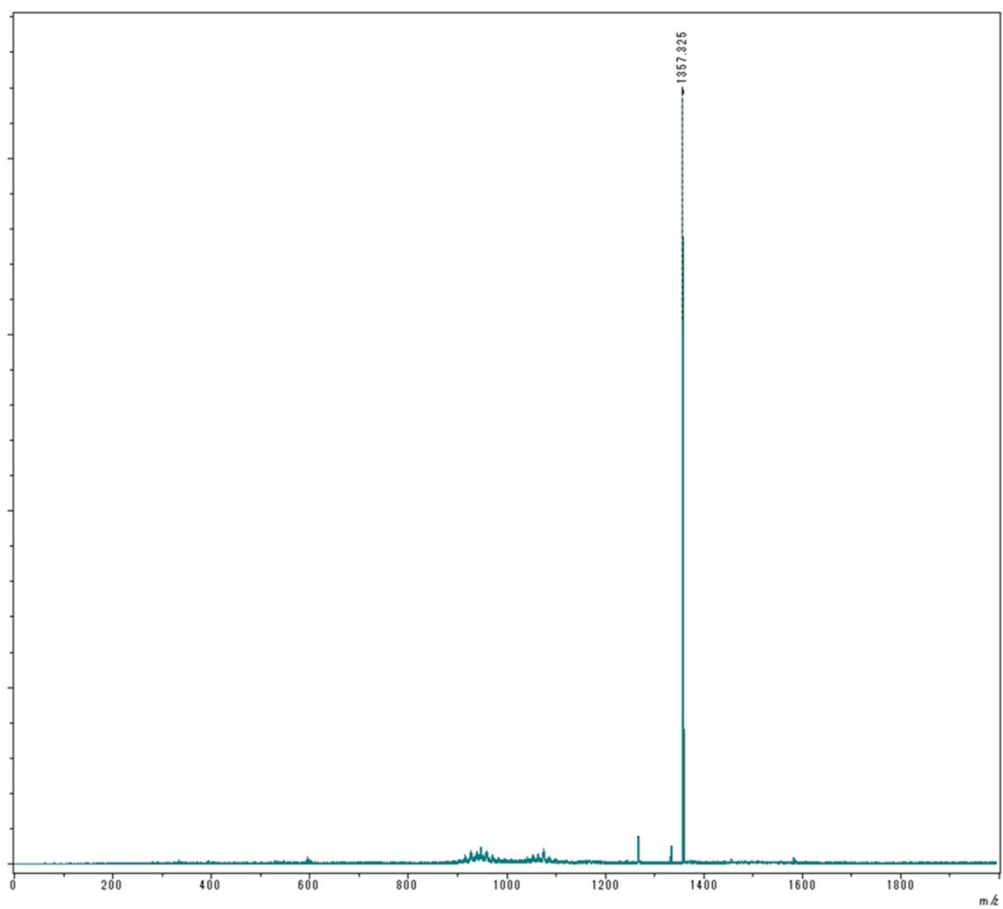

Fig. S7 MALDI-TOF mass chart of **4R**.

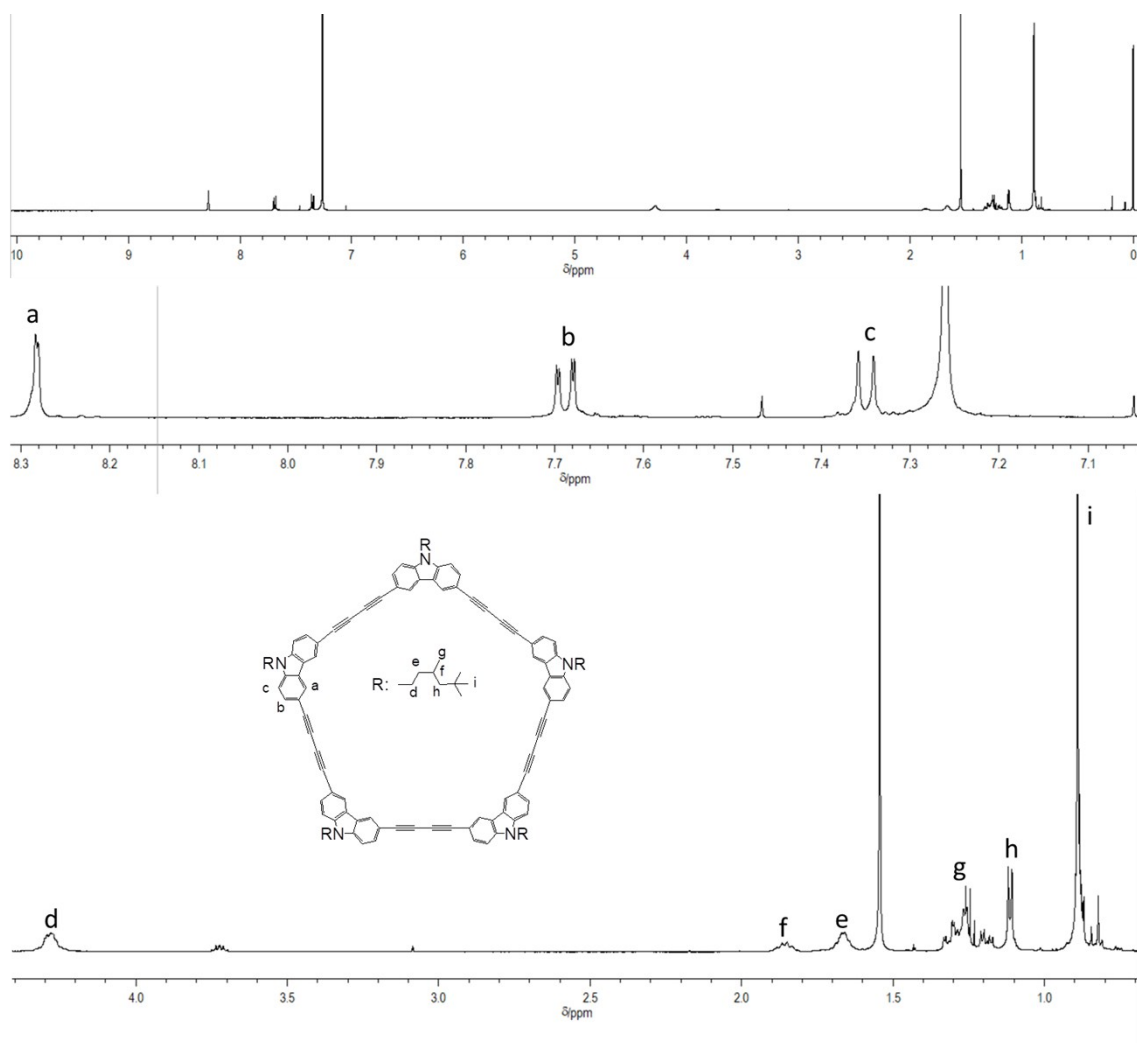

Fig. S8  $^1\text{H}$  NMR spectra of **5R** in  $\text{CDCl}_3$ .

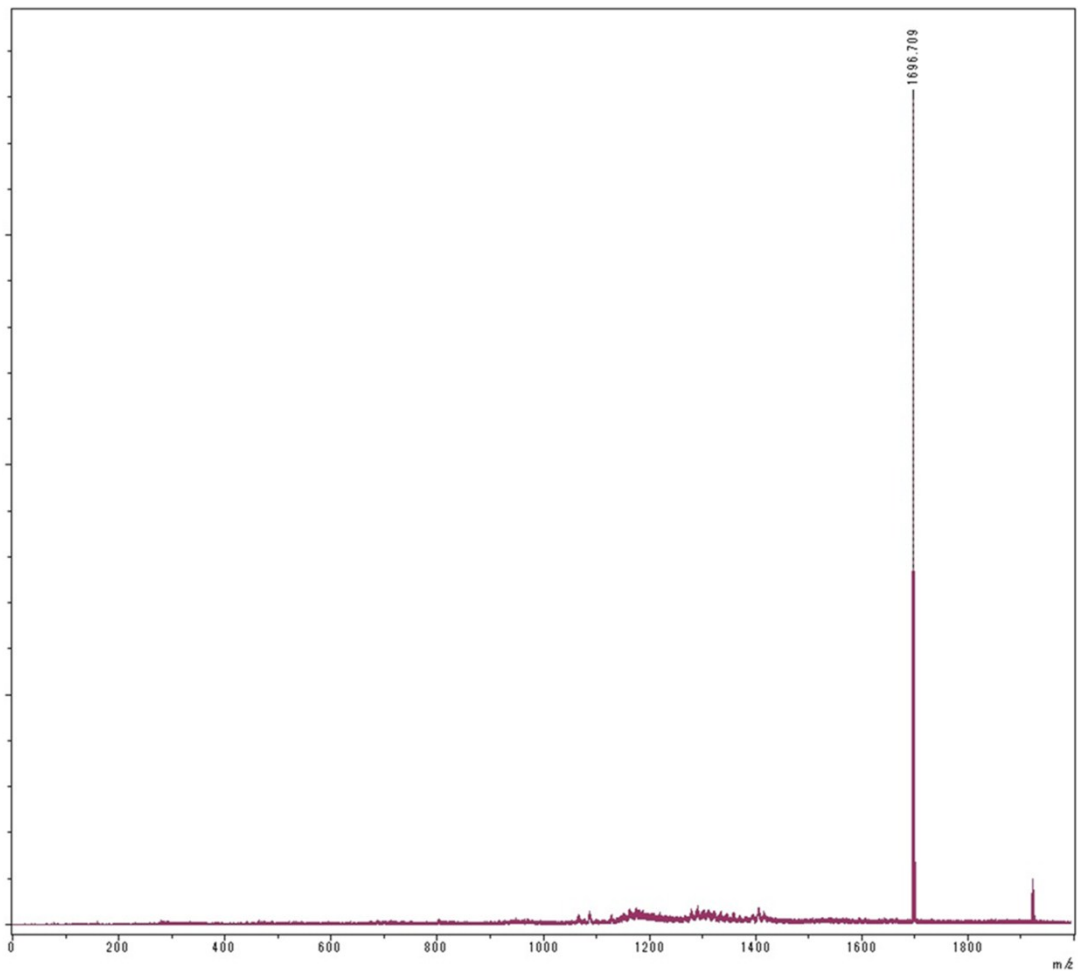

Fig. S9 MALDI-TOF mass chart of **5R**.



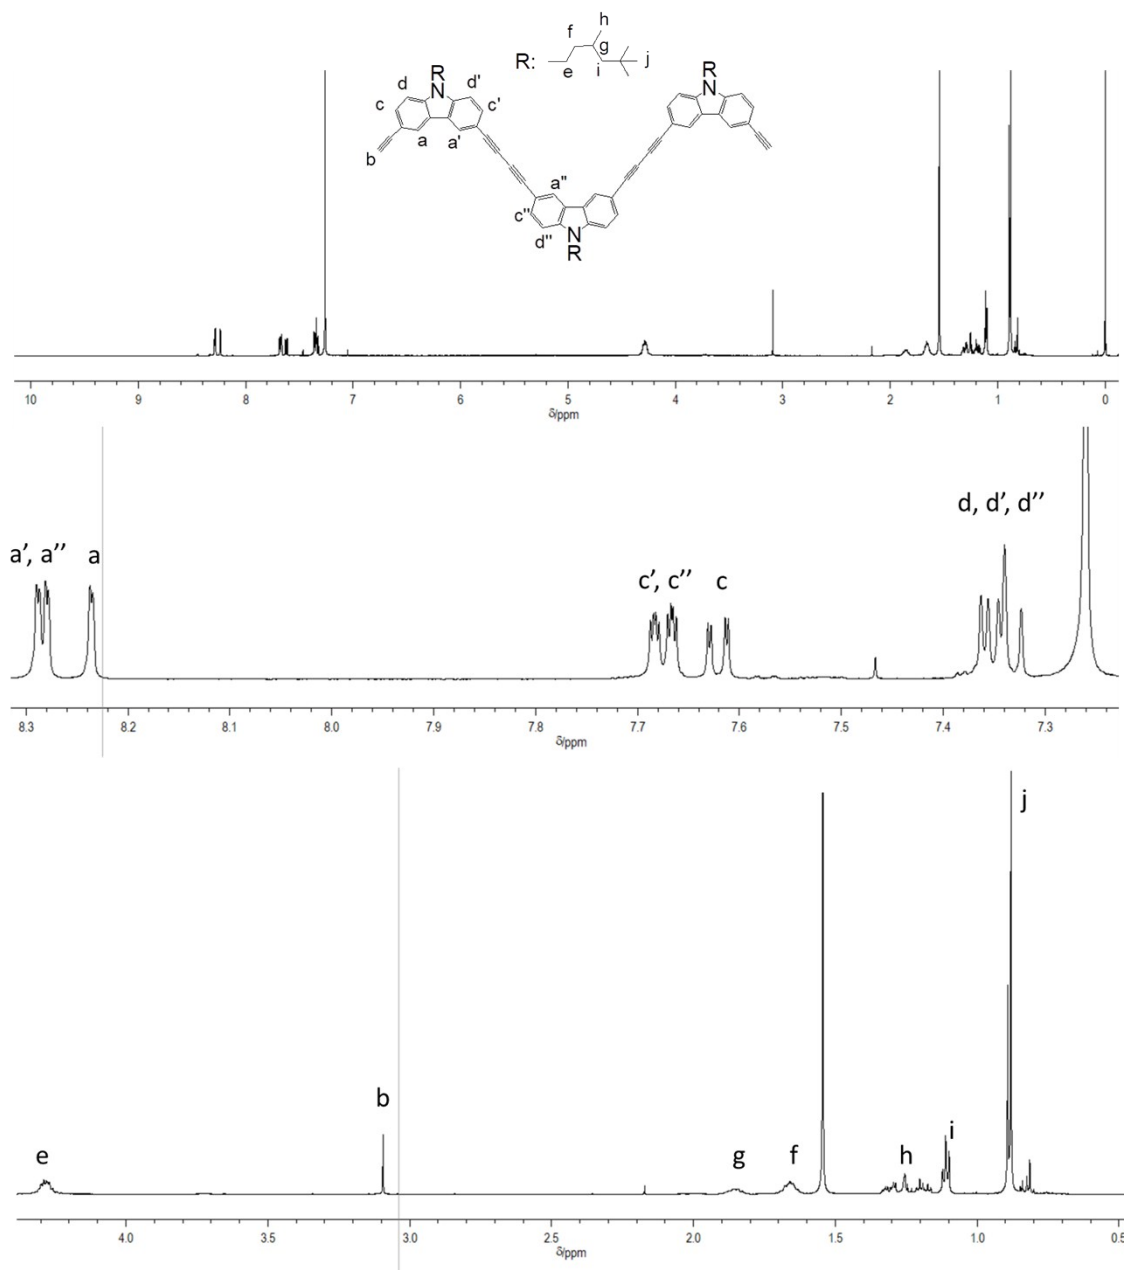

Fig. S10  $^1\text{H}$  NMR spectra of **3L** in  $\text{CDCl}_3$ .

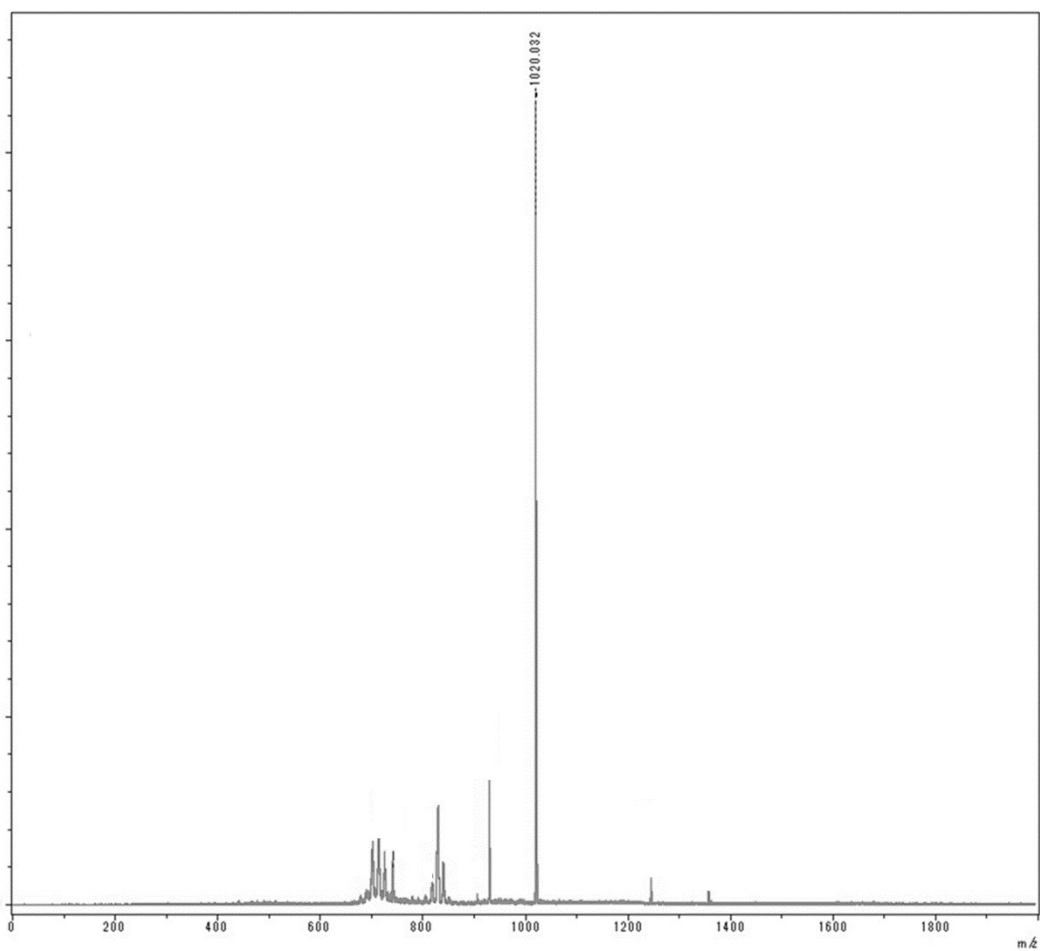

Fig. S11 MALDI-TOF mass chart of **3L**.

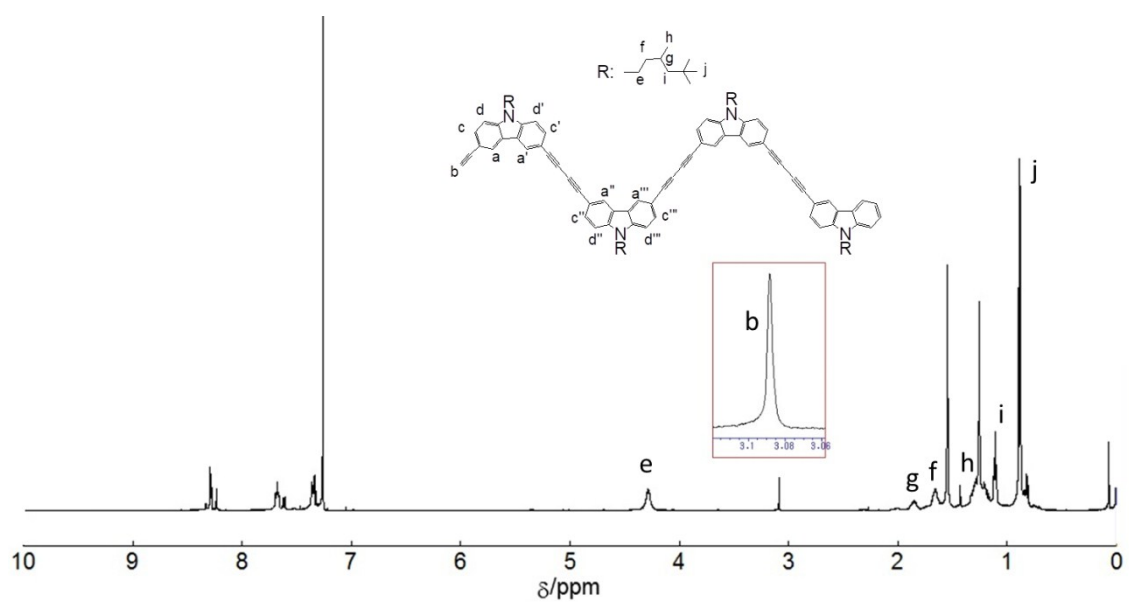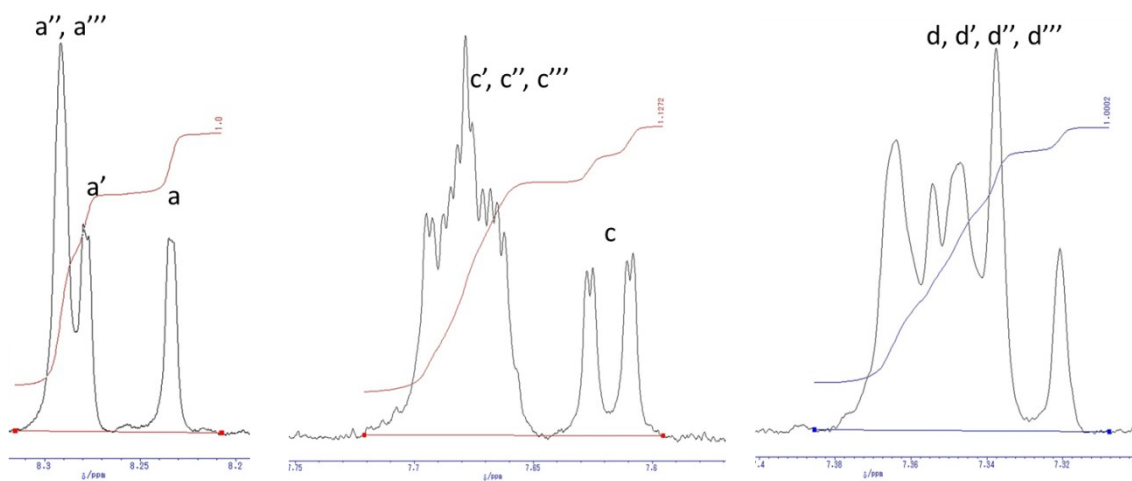

Fig. S12  $^1\text{H}$  NMR spectra of **4L** in  $\text{CDCl}_3$ .

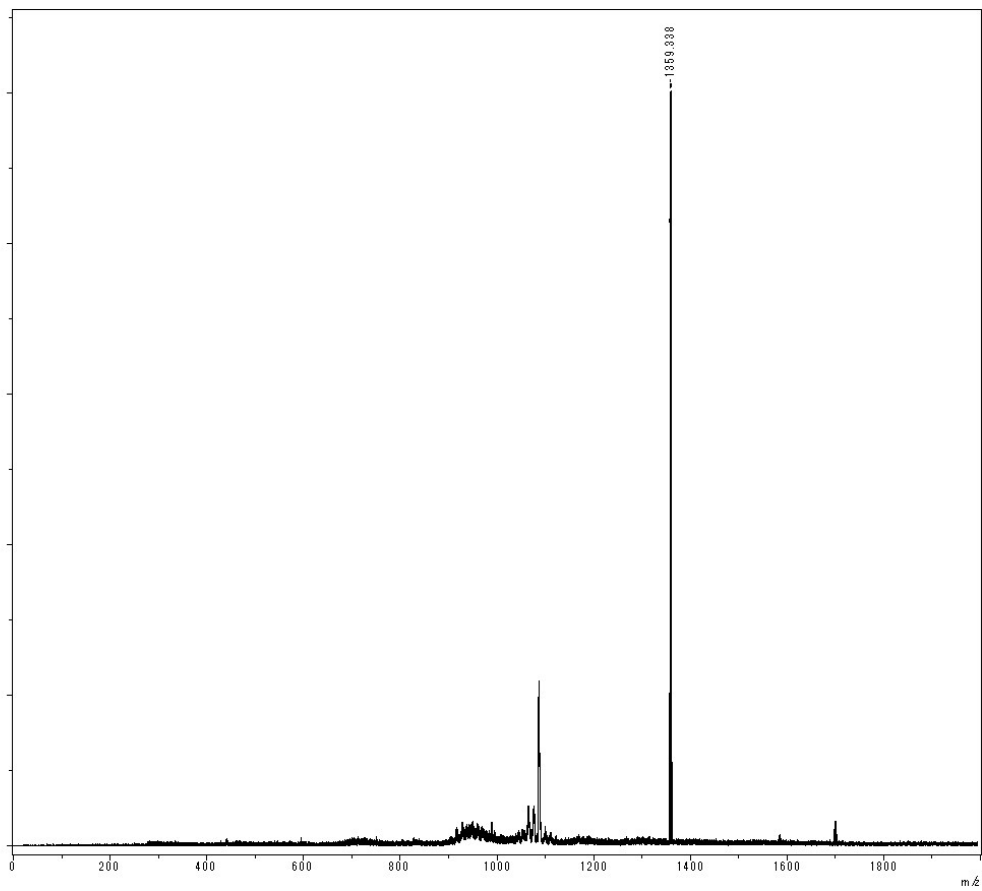

Fig. S13 MALDI-TOF mass chart of **4L**.

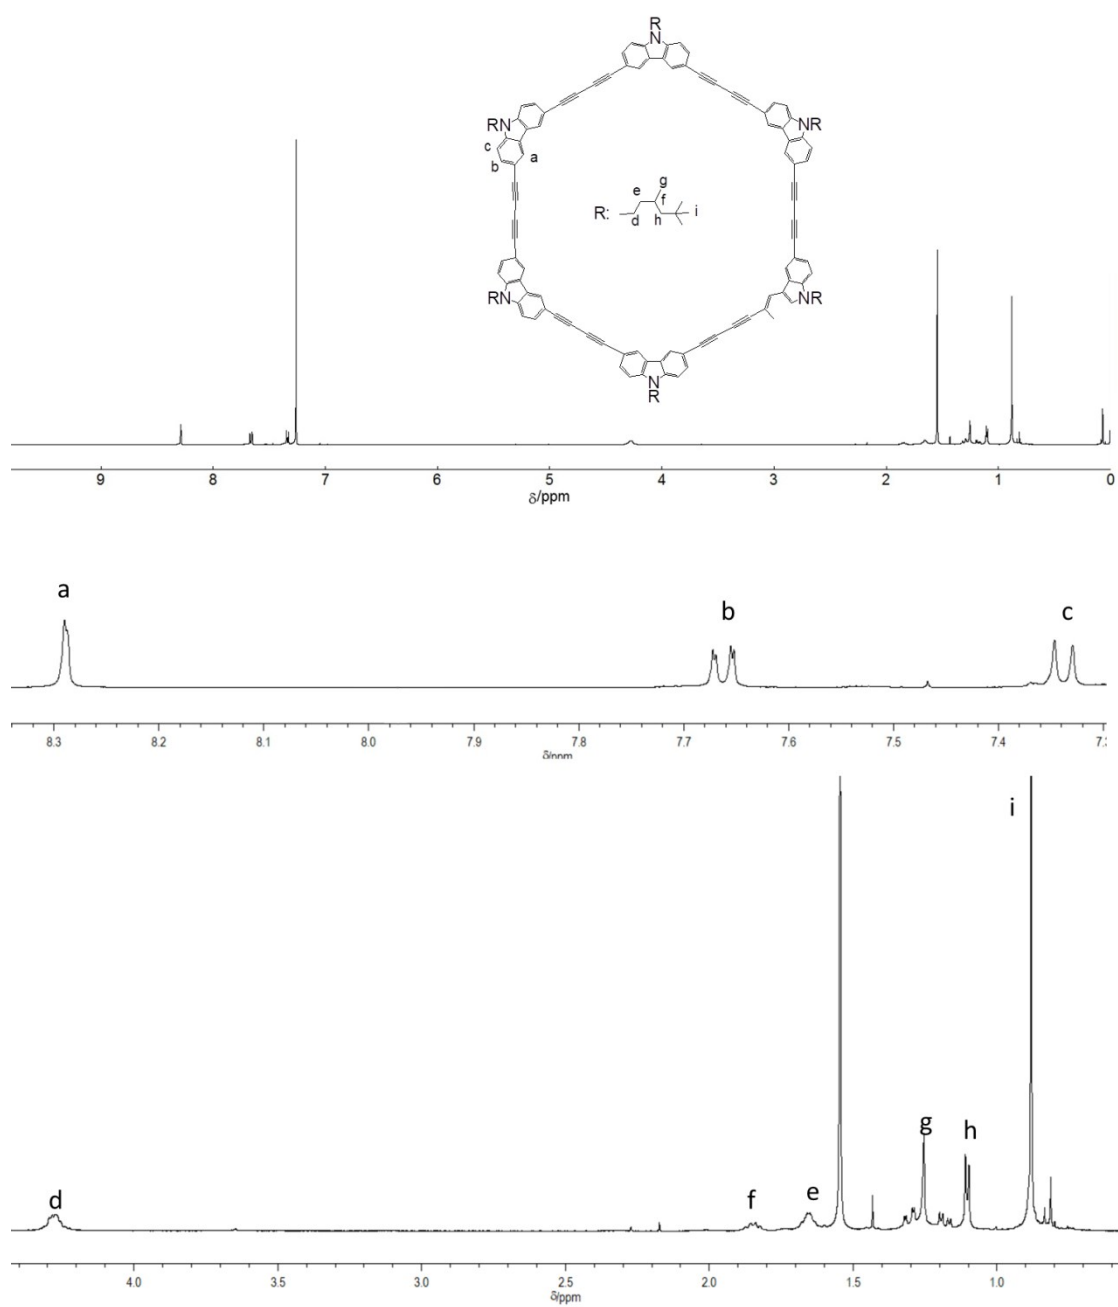

Fig. S14  $^1\text{H}$  NMR spectra of **6R** in  $\text{CDCl}_3$ .

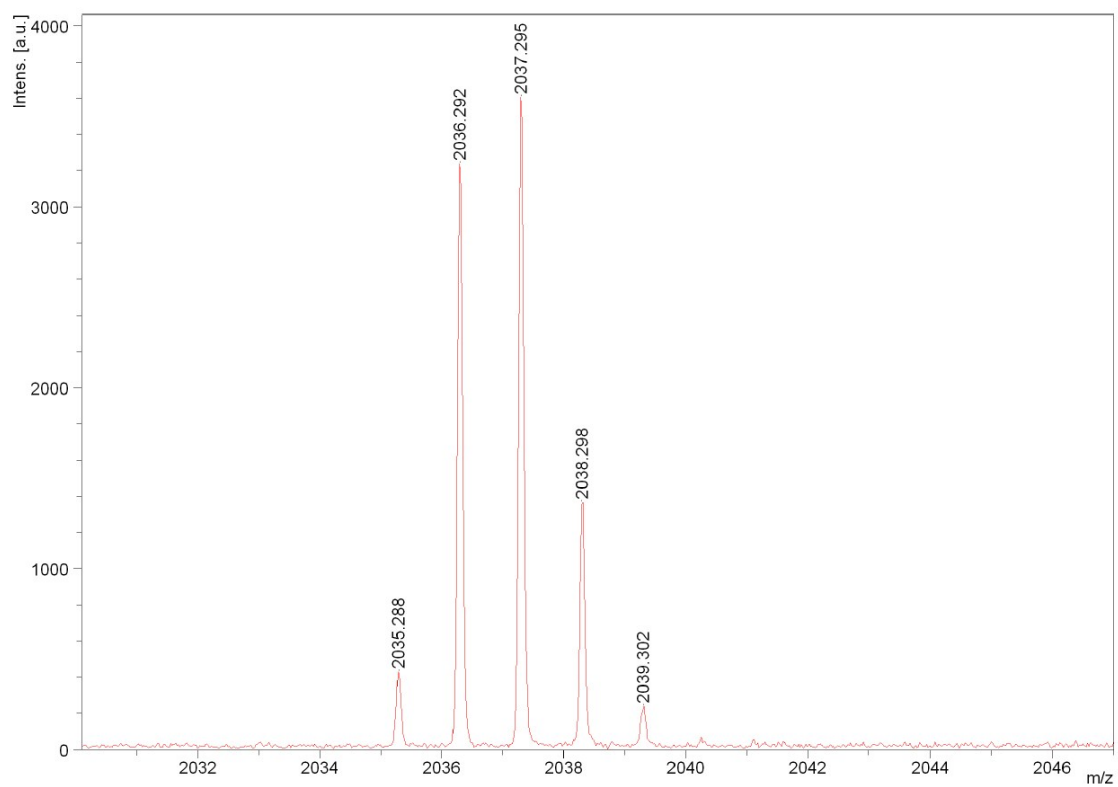

Fig. S15 MALDI-TOF mass chart of **6R**.

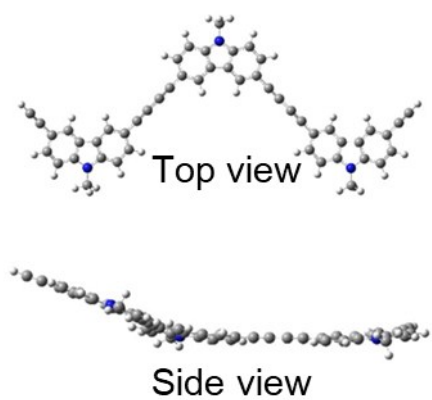

Fig. S16 Optimized structure of **3L**. Note that this structure is one of the conformations in solution.

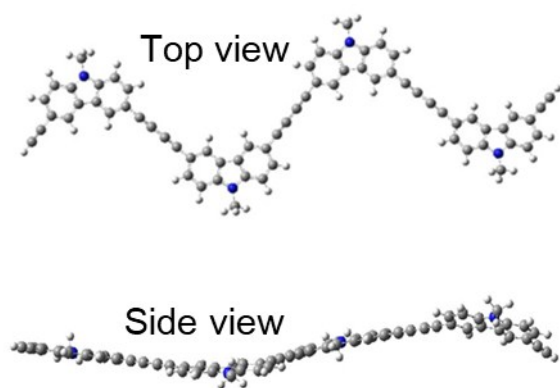

Fig. S17 Optimized structure of **4L**. Note that this structure is one of the conformations in solution.

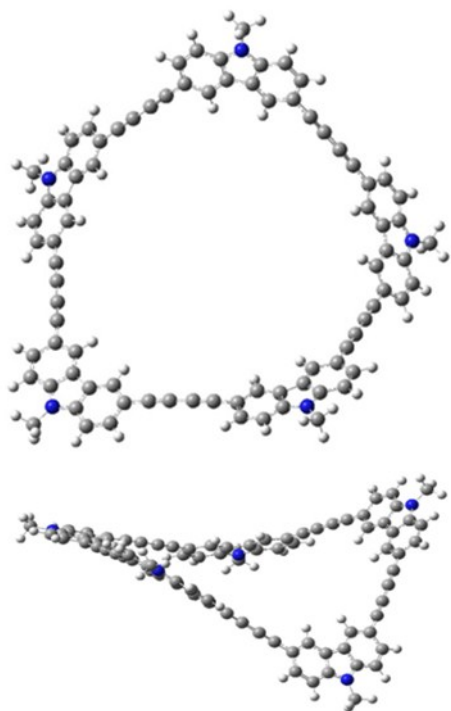

Fig. S18 Optimized structure of **5R** . Two views from different angles. Note that this structure is one of the conformations in solution.



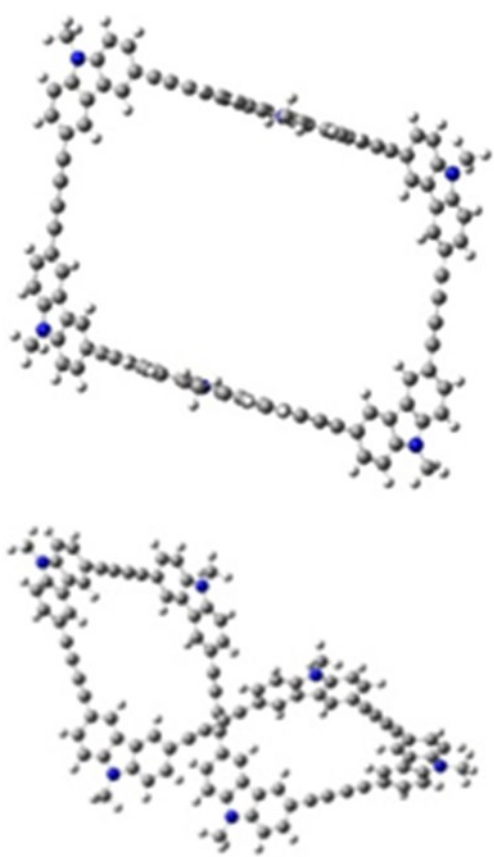

Fig. S19 Optimized structure of **6R**. Two views from different angles. Note that this structure is one of the conformations in solution.

Table S1 Calculated Absorption Wavelengths, Major Transitions, and Oscillator Strengths. .

| Entry     | Wavelength / nm | Contributions to transition                                        | Oscillator strength |
|-----------|-----------------|--------------------------------------------------------------------|---------------------|
| <b>3L</b> | 342             | HOMO→LUMO (0.56)<br>HOMO-1→LUMO+1 (0.32)                           | 2.76                |
| <b>3R</b> | 356             | HOMO-1→LUMO (0.45)<br>HOMO→LUMO+1 (0.45)                           | 0.00                |
| <b>4L</b> | 346             | HOMO→LUMO (0.51)<br>HOMO-1→LUMO+1 (0.30)                           | 3.87                |
| <b>4R</b> | 356             | HOMO→LUMO (0.47)<br>HOMO-1→LUMO+1 (-0.32)<br>HOMO-2→LUMO+2 (-0.32) | 0.00                |
| <b>5R</b> | 343             | HOMO→LUMO (0.52)<br>HOMO-1→LUMO+1 (-0.23)                          | 1.13                |
| <b>6R</b> | 340             | HOMO-1→LUMO+1 (0.43)<br>HOMO→LUMO (0.41)                           | 0.03                |
|           | 337             | HOMO→LUMO+1 (0.43)<br>HOMO-1→LUMO (0.42)                           | 3.41                |

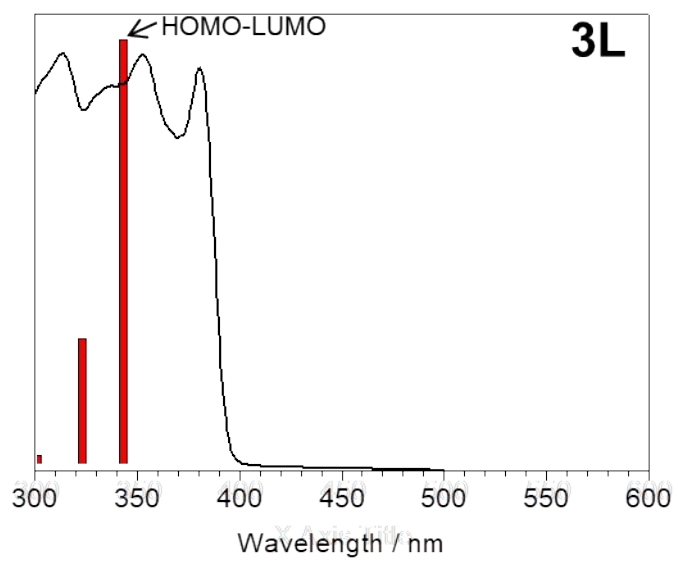

Fig. S20 UV/Vis absorption spectra with the calculated oscillator strengths of **3L**.

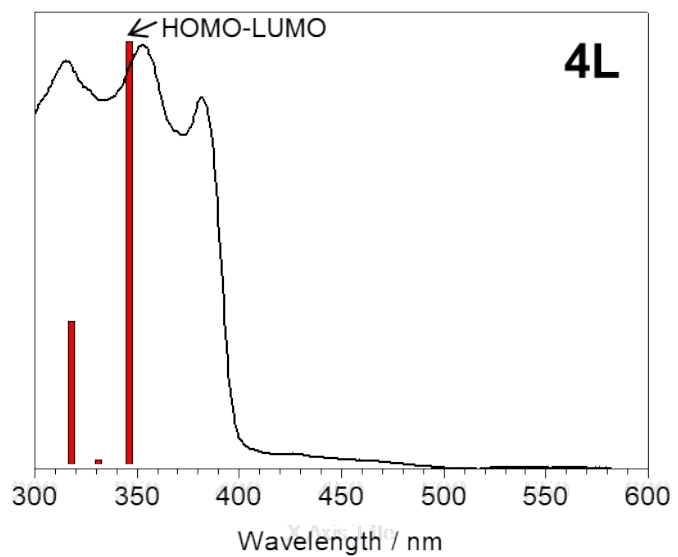

Fig. S21 UV/Vis absorption spectra with the calculated oscillator strengths of **4L**.

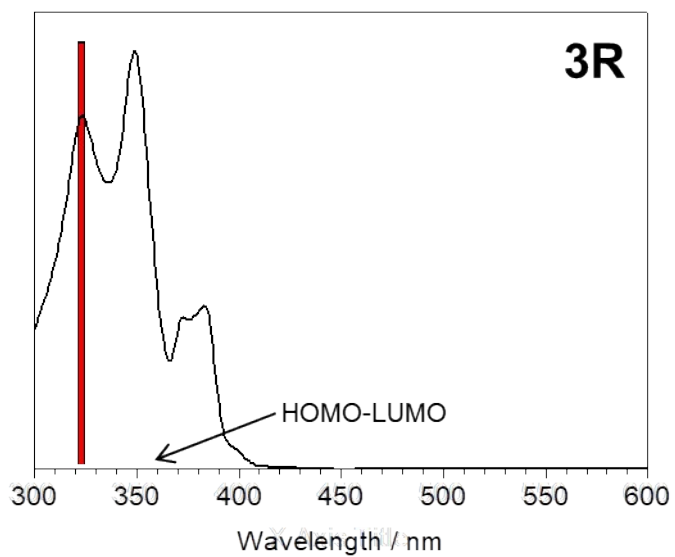

Fig. S22 UV/Vis absorption spectra with the calculated oscillator strengths of **3R**.

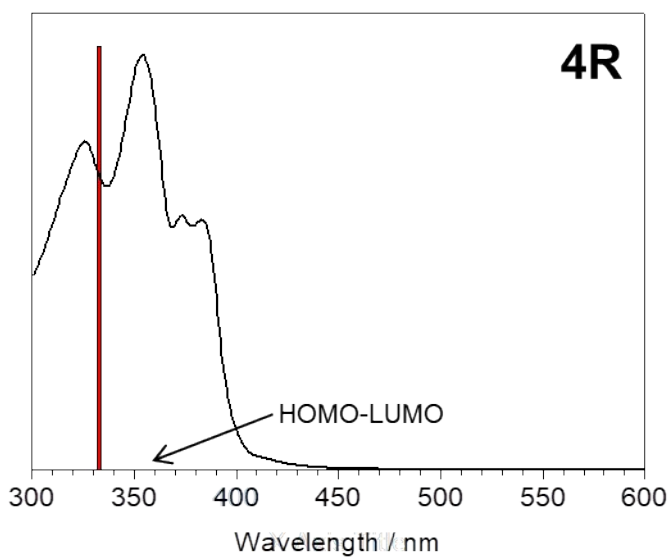

Fig. S23 UV/Vis absorption spectra with the calculated oscillator strengths of **4R**.

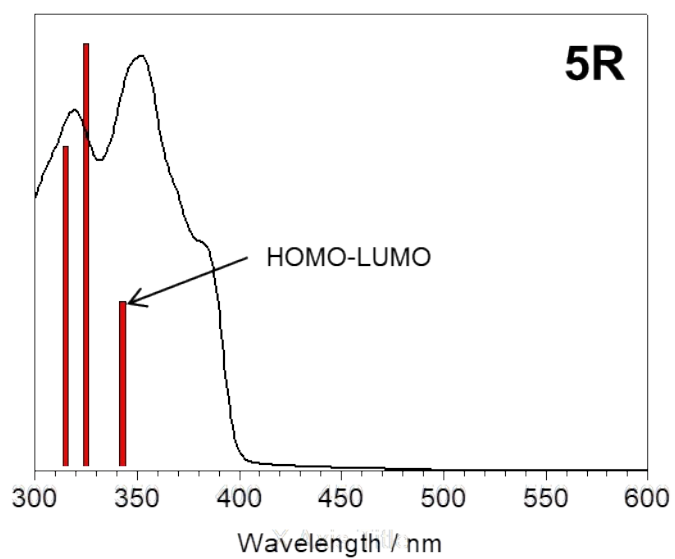

Fig. S24 UV/Vis absorption spectra with the calculated oscillator strengths of **5R**.

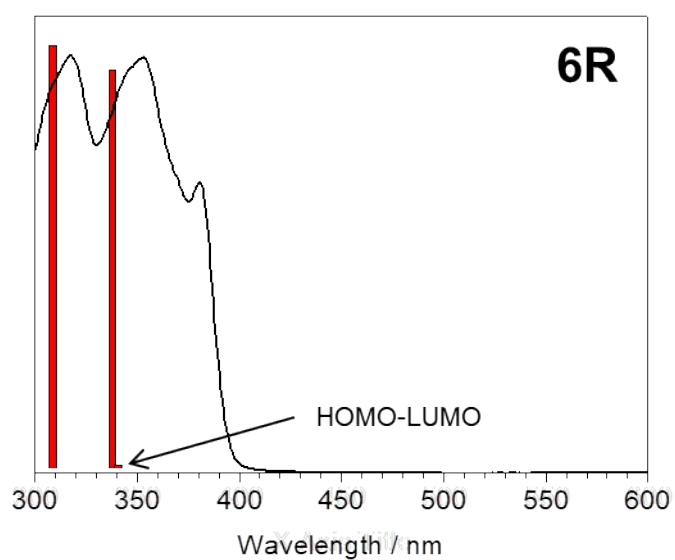

Fig. S25 UV/Vis absorption spectra with the calculated oscillator strengths of **6R**.
